# Supplementary material
Source: Springer Nature journal article supplement (https://www.springermedizin.de/resource/supplementary/12876_2010_477_MOESM1_ESM.pdf/9437094)

A.

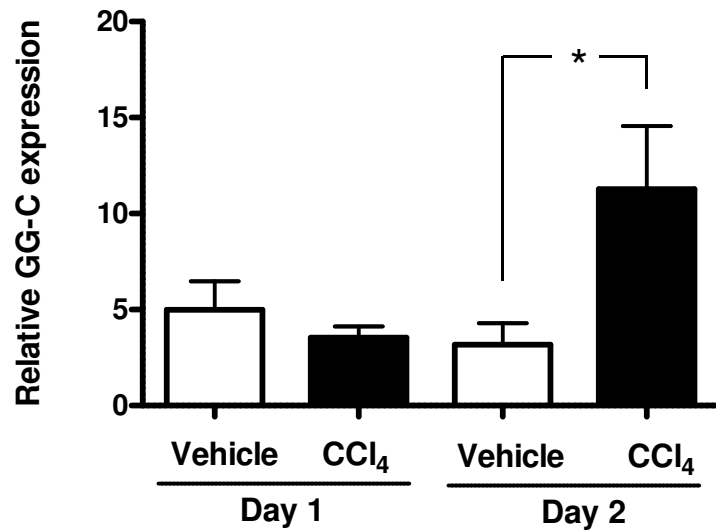

C.

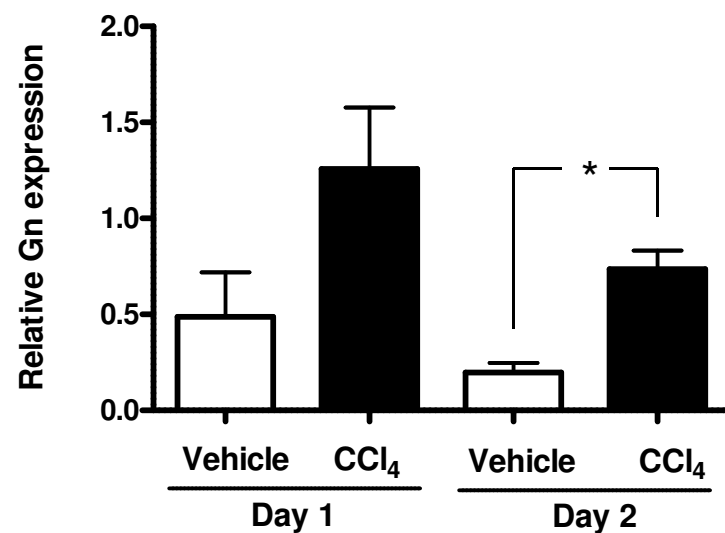

B.

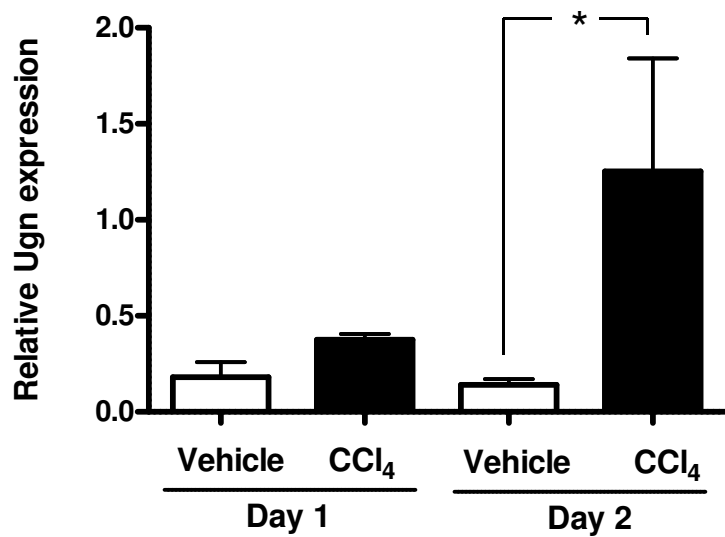

D.

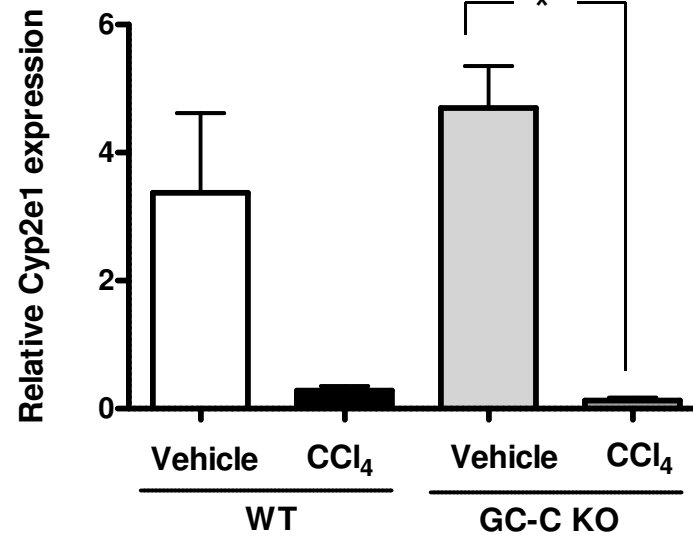

Supplement: MOESM1 [file 9437094]
